# Supplementary material for: The Effectiveness and Tolerability of Glycopyrronium for Patients with Chronic Obstructive Pulmonary Disease in a Clinical Setting: GLARE-Taiwan
Source: MDPI journal article supplement (doi:10.3390/jcm11206210), 2022-10-21
Supplement: s1 [file s1]

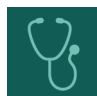

Article

# The effectiveness and tolerability of glycopyrronium for patients with chronic obstructive pulmonary disease in a clinical setting: GLARE-Taiwan

Wei-Chang Huang <sup>1,2,3,4,5,†</sup>, Sheng-Hao Lin <sup>2,6,†</sup>, Liang-Wen Hang <sup>7,\*</sup>, Ching-Hsiung Lin <sup>2,6,\*</sup> and Jeng-Yuan Hsu <sup>1,8,\*</sup>

<sup>1</sup> Division of Chest Medicine, Department of Internal Medicine, Taichung Veterans General Hospital, Taichung, 407, Taiwan

<sup>2</sup> Department of Post-Baccalaureate Medicine, College of Medicine, National Chung Hsing University, Taichung, 402, Taiwan

<sup>3</sup> Ph.D. Program in Translational Medicine, National Chung Hsing University, Taichung, 402, Taiwan;

<sup>4</sup> School of Medicine, Chung Shan Medical University, Taichung, 402, Taiwan

<sup>5</sup> Department of Medical Technology, Jen-Teh Junior College of Medicine, Nursing and Management, Miaoli, 350, Taiwan

<sup>6</sup> Division of Chest Medicine, Department of Internal Medicine, Changhua Christian Hospital, Changhua, Taiwan

<sup>7</sup> Sleep Medicine Center, Department of Pulmonary and Critical Care Medicine, China Medical University Hospital, Taichung, Taiwan

<sup>8</sup> School of Physical Therapy, Chung Shan Medical University, Taichung, 402, Taiwan;

\* Correspondence: huchen0328@gmail.com (J.-Y.H.); teddy@cch.org.tw (C.-H.L.) and lungwen.hang@gmail.com (L.-W.H.).

† These authors contributed equally to this work.

**Citation:** Huang, W.-C.; Lin, S.-H.; Hang, L.-W.; Lin, C.-H.; Hsu, J.-Y. The effectiveness and tolerability of glycopyrronium for patients with chronic obstructive pulmonary disease in a clinical setting: GLARE-Taiwan. *J. Clin. Med.* **2022**, *11*, x. <https://doi.org/10.3390/xxxxx>

Academic Editor(s):

Received: date

Accepted: date

Published: date

**Publisher's Note:** MDPI stays neutral with regard to jurisdictional claims in published maps and institutional affiliations.

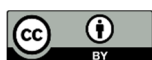

**Copyright:** © 2022 by the authors. Submitted for possible open access publication under the terms and conditions of the Creative Commons Attribution (CC BY) license (<http://creativecommons.org/licenses/by/4.0/>).

**Table S1.** The change in CCQ total and domain scores between the baseline and end of study in the full analysis dataset and its corresponding subgroups.

|                                   | Treatment naïve patients<br>(n=9) | Add-on patients<br>(n=67) | Switched patients<br>(n=26) | Total<br>(n=102)     |
|-----------------------------------|-----------------------------------|---------------------------|-----------------------------|----------------------|
| <b>CCQ total score</b>            |                                   |                           |                             |                      |
|                                   | Baseline                          |                           |                             |                      |
| Mean±SD                           | 1.80±0.86                         | 2.18±1.05                 | 1.52±1.07                   | 2.02±1.04            |
| Median (Min-Max)                  | 1.85 (1.1, 2.33)                  | 2.00 (1.43, 2.90)         | 1.20 (1.00, 1.80)           | 1.80 (1.3, 2.7)      |
|                                   | Month 6/EOS                       |                           |                             |                      |
| Mean±SD                           | 1.4 ±0.96                         | 1.69±1.19                 | 1.45±1.10                   | 1.63±1.14            |
| Median (Min-Max)                  | 1.10 (0.75, 2.15)                 | 1.35 (0.80, 2.35)         | 1.20 (0.70, 1.75)           | 1.30 (0.80, 2.25)    |
|                                   | Change from baseline              |                           |                             |                      |
| Mean±SD                           | -0.61±0.57                        | -0.45±0.95                | 0.14±0.73                   | -0.39±0.90           |
| Median (Min-Max)                  | -0.80 (-0.90, -0.15)              | -0.40 (-0.80, 0.05)       | 0.15 (-0.20, 0.60)          | -0.30 (-0.80, 0.10)  |
| P-value                           | 0.047*                            | 0.004*                    | 0.484                       | 0.002*               |
| <b>CCQ symptoms score</b>         |                                   |                           |                             |                      |
|                                   | Baseline                          |                           |                             |                      |
| Mean±SD                           | 2.11±1.04                         | 2.46±1.05                 | 1.75±1.05                   | 2.30±1.07            |
| Median (Min-Max)                  | 1.88 (1.50, 2.69)                 | 2.25 (1.75, 3.25)         | 1.50 (1.00, 2.00)           | 2.00 (1.50, 3.06)    |
|                                   | Month 6/EOS                       |                           |                             |                      |
| Mean±SD                           | 1.46±0.60                         | 1.77±1.25                 | 1.53±0.86                   | 1.70±1.14            |
| Median (Min-Max)                  | 1.25 (1.00, 2.00)                 | 1.50 (0.81, 2.50)         | 1.38 (0.94, 1.94)           | 1.50 (1.00, 2.50)    |
|                                   | Change from baseline              |                           |                             |                      |
| Mean±SD                           | -0.82±0.55                        | -0.71±0.90                | 0.09±0.87                   | -0.61±0.90           |
| Median (Min-Max)                  | -0.75 (-1.25, -0.50)              | -0.75 (-1.19, -0.25)      | 0.38 (-0.44, 0.56)          | -0.75 (-1.25, -0.19) |
| P-value                           | 0.031*                            | <0.001**                  | 0.719                       | <0.001**             |
| <b>CCQ functional state score</b> |                                   |                           |                             |                      |
|                                   | Baseline                          |                           |                             |                      |
| Mean±SD                           | 1.38±1.02                         | 1.92±1.27                 | 1.38±1.09                   | 1.75±1.22            |
| Median (Min-Max)                  | 1.13 (0.50, 2.00)                 | 1.75 (1.00, 2.69)         | 1.00 (0.75, 1.50)           | 1.50 (1.00, 2.50)    |
|                                   | Month 6/EOS                       |                           |                             |                      |
| Mean±SD                           | 1.36±1.46                         | 1.79±1.39                 | 1.41±1.22                   | 1.68±1.37            |
| Median (Min-Max)                  | 1.00 (0.75, 1.25)                 | 1.50 (1.00, 2.19)         | 1.00 (0.69, 1.94)           | 1.50 (0.75, 2.06)    |
|                                   | Change from baseline              |                           |                             |                      |
| Mean±SD                           | -0.18±1.24                        | -0.14±1.21                | 0.19±0.79                   | -0.10±1.15           |
| Median (Min-Max)                  | -0.25 (-0.75, 0.63)               | -0.25 (-0.75, 0.69)       | 0.00 (-0.13, 0.31)          | -0.25 (-0.75, 0.75)  |
| P-value                           | 0.844                             | 0.466                     | 0.625                       | 0.529                |
| <b>CCQ mental state score</b>     |                                   |                           |                             |                      |
|                                   | Baseline                          |                           |                             |                      |
| Mean±SD                           | 2.05±1.76                         | 2.12±1.92                 | 1.35±1.68                   | 2.01±1.87            |
| Median (Min-Max)                  | 1.75 (1.00, 2.50)                 | 1.50 (0.13, 3.88)         | 0.50 (0.00, 2.50)           | 1.50 (0.50, 3.13)    |
|                                   | Month 6/EOS                       |                           |                             |                      |
| Mean±SD                           | 1.57±1.92                         | 1.32±1.69                 | 1.38±1.62                   | 1.36±1.68            |
| Median (Min-Max)                  | 1.00 (0.00, 2.75)                 | 0.75 (0.00, 2.00)         | 0.75 (0.00, 2.38)           | 1.00 (0.00, 2.00)    |
|                                   | Change from baseline              |                           |                             |                      |
| Mean±SD                           | -1.07±1.62                        | -0.58±1.77                | 0.13±1.55                   | -0.54±1.72           |
| Median (Min-Max)                  | -1.00 (-1.25, -0.75)              | -0.50 (-1.50, 0.00)       | 0.00 (-0.50, 1.25)          | 0.00 (-1.50, 0.13)   |
| P-value                           | 0.156                             | 0.038*                    | >0.99                       | 0.021*               |

\*p<0.05, \*\*p<0.001. Abbreviations: CCQ, clinical COPD questionnaire; EOS, end of study; Max, maximum; Min, minimum; SD, standard deviation.

**Table S2.** The change in CCQ total and domain scores between the baseline and end of study in the “Completers” dataset and its corresponding subgroups.

|                                   | Treatment naïve<br>patients<br>(n=4) | Add-on patients<br>(n=34) | Switched patients<br>(n=7) | Total<br>(n=45)     |
|-----------------------------------|--------------------------------------|---------------------------|----------------------------|---------------------|
| <b>CCQ total score</b>            |                                      |                           |                            |                     |
| Baseline                          |                                      |                           |                            |                     |
| Mean±SD                           | 2.23±0.71                            | 2.09±0.96                 | 1.19±0.60                  | 1.96±0.95           |
| Median (Min-Max)                  | 2.10 (1.60, 3.00)                    | 1.90 (0.40, 4.00)         | 1.10 (0.30, 2.10)          | 1.80 (0.30, 4.4)    |
| Month 6/EOS                       |                                      |                           |                            |                     |
| Mean±SD                           | 1.35±1.06                            | 1.67±1.18                 | 1.26±1.03                  | 1.58±1.13           |
| Median (Min-Max)                  | 1.35 (0.60, 2.10)                    | 1.20 (0.20, 4.30)         | 1.10 (0.20, 3.40)          | 1.20 (0.20, 4.30)   |
| Change from baseline              |                                      |                           |                            |                     |
| Mean±SD                           | -1.20±0.42                           | -0.41±0.95                | 0.07±0.77                  | -0.36±0.93          |
| Median (Min-Max)                  | -1.20 (-1.50, -0.90)                 | -0.30 (-2.70, 1.40)       | 0.10 (-1.10, 1.30)         | -0.30 (-2.70, 1.40) |
| P-value                           | 0.500                                | 0.029*                    | 0.719                      | 0.022*              |
| <b>CCQ symptoms score</b>         |                                      |                           |                            |                     |
| Baseline                          |                                      |                           |                            |                     |
| Mean±SD                           | 2.25±0.50                            | 2.49±0.97                 | 1.36±0.56                  | 2.30±0.98           |
| Median (Min-Max)                  | 2.25 (1.75, 2.75)                    | 2.25 (0.25, 4.75)         | 1.00 (0.74, 2.25)          | 2.25 (0.25, 4.75)   |
| Month 6/EOS                       |                                      |                           |                            |                     |
| Mean±SD                           | 1.50±0.71                            | 1.77±1.33                 | 1.39±0.83                  | 1.68±1.22           |
| Median (Min-Max)                  | 1.50 (1.00, 2.00)                    | 1.50 (0.00, 5.00)         | 1.25 (0.50, 3.00)          | 1.50 (0.00, 5.00)   |
| Change from baseline              |                                      |                           |                            |                     |
| Mean±SD                           | -1.00±0.35                           | -0.74±0.91                | 0.04±0.92                  | -0.61±0.93          |
| Median (Min-Max)                  | -1.00 (-1.25, -0.75)                 | -0.75 (-2.50, 1.25)       | 0.25 (-1.25, 1.25)         | -0.75 (-2.50, 1.25) |
| P-value                           | 0.500                                | <0.001**                  | 0.906                      | <0.001**            |
| <b>CCQ functional state score</b> |                                      |                           |                            |                     |
| Baseline                          |                                      |                           |                            |                     |
| Mean±SD                           | 1.83±1.44                            | 1.8±1.14                  | 1.03±0.73                  | 1.74±1.12           |
| Median (Min-Max)                  | 1.00 (1.00, 3.40)                    | 1.75 (0.00, 4.25)         | 1.00 (0.00, 2.25)          | 1.50 (0.00, 4.25)   |
| Month 6/EOS                       |                                      |                           |                            |                     |
| Mean±SD                           | 0.88±0.53                            | 1.84±1.26                 | 1.25±1.22                  | 1.68±1.24           |
| Median (Min-Max)                  | 0.88 (0.50, 1.25)                    | 1.50 (0.50, 5.50)         | 1.00 (0.00, 3.75)          | 1.50 (0.00, 5.50)   |
| Change from baseline              |                                      |                           |                            |                     |
| Mean±SD                           | -1.38±1.24                           | -0.07±1.03                | 0.21±0.85                  | -0.09±1.03          |
| Median (Min-Max)                  | -1.38 (-2.25, -0.50)                 | 0.00 (-2.75, 1.50)        | 0.00 (-0.75, 1.50)         | 0.00 (-2.75, 1.50)  |
| P-value                           | 0.500                                | 0.721                     | 0.625                      | 0.613               |
| <b>CCQ mental state score</b>     |                                      |                           |                            |                     |
| Baseline                          |                                      |                           |                            |                     |
| Mean±SD                           | 3.00±0.87                            | 1.70±1.82                 | 1.14±1.44                  | 1.70±1.75           |
| Median (Min-Max)                  | 2.50 (2.50, 4.00)                    | 1.00 (0.00, 6.00)         | 0.00 (0.00, 3.00)          | 1.50 (0.00, 6.00)   |
| Month 6/EOS                       |                                      |                           |                            |                     |
| Mean±SD                           | 2.00±2.82                            | 1.12±1.53                 | 1.00±1.32                  | 1.15±1.52           |
| Median (Min-Max)                  | 2.00 (0.00, 4.00)                    | 0.50 (0.00, 6.00)         | 0.50 (0.00, 3.50)          | 0.50 (0.00, 6.00)   |
| Change from baseline              |                                      |                           |                            |                     |
| Mean±SD                           | -1.25±3.89                           | -0.41±1.68                | -0.14±1.46                 | -0.41±1.72          |
| Median (Min-Max)                  | -0.50 (-4.00, 0.00)                  | 0.00 (-4.00, 3.50)        | 0.00 (-2.0, 2.0)           | 0.00 (-4.00, 3.50)  |
| P-value                           | 0.954                                | 0.197                     | 0.998                      | 0.152               |

\*p<0.05, \*\*p<0.001. Abbreviations: CCQ, clinical COPD questionnaire; EOS, end of study; Max, maximum; Min, minimum; SD, standard deviation.

**Table S3.** The change in CCQ total and domain scores between the baseline and end of study in the “Changers” dataset and its corresponding subgroups.

|                                   | Treatment naïve patients<br>(n=4) | Add-on patients<br>(n=19) | Switched patients<br>(n=10) | Total<br>(n=33)     |
|-----------------------------------|-----------------------------------|---------------------------|-----------------------------|---------------------|
| <b>CCQ total score</b>            |                                   |                           |                             |                     |
| Baseline                          |                                   |                           |                             |                     |
| Mean±SD                           | 2.10±0.85                         | 2.36±1.02                 | 1.33±0.78                   | 2.18±0.97           |
| Median (Min-Max)                  | 2.00 (1.00, 3.50)                 | 2.20 (0.90, 4.50)         | 1.10 (0.70, 2.20)           | 2.00 (0.70, 4.50)   |
|                                   |                                   | Month 6/EOS               |                             |                     |
| Mean±SD                           | 1.48±1.05                         | 1.74±1.26                 | 2.80±0.00                   | 1.73±1.18           |
| Median (Min-Max)                  | 1.10 (0.30, 2.90)                 | 1.40 (0.20, 4.20)         | 2.80 (2.80, 2.80)           | 1.40 (0.20, 4.2)    |
|                                   |                                   | Change from baseline      |                             |                     |
| Mean±SD                           | -0.38±0.44                        | -0.56±0.98                | 0.60±0.00                   | -0.45±0.87          |
| Median (Min-Max)                  | -0.20 (-0.90, 0.10)               | -0.50 (-3.00, 0.90)       | 0.60 (0.00, 1.20)           | -0.40 (-3.00, 0.90) |
| P-value                           | 0.188                             | 0.055                     | 0.622                       | 0.036*              |
| <b>CCQ symptoms score</b>         |                                   |                           |                             |                     |
| Baseline                          |                                   |                           |                             |                     |
| Mean±SD                           | 2.48±1.09                         | 2.43±0.98                 | 1.42±0.63                   | 2.35±1.02           |
| Median (Min-Max)                  | 2.25 (1.25, 4.50)                 | 2.50 (0.75, 4.50)         | 1.50 (0.75, 2.00)           | 2.13 (0.75, 4.50)   |
|                                   |                                   | Month 6/EOS               |                             |                     |
| Mean±SD                           | 1.45±0.65                         | 1.79±1.12                 | 2.50±0.00                   | 1.74±0.99           |
| Median (Min-Max)                  | 1.25 (0.75, 2.25)                 | 2.00 (0.25, 4.25)         | 2.50 (2.50, 2.50)           | 2.00 (0.25, 4.25)   |
|                                   |                                   | Change from baseline      |                             |                     |
| Mean±SD                           | -0.75±0.64                        | -0.63±0.91                | 0.50±0.00                   | -0.61±0.85          |
| Median (Min-Max)                  | -0.75 (-1.50, 0.00)               | -0.50 (-3.00, 0.00)       | 0.50 (0.00, 1.50)           | -0.50 (-3.00, 0.75) |
| P-value                           | 0.125                             | 0.019*                    | 0.632                       | 0.006*              |
| <b>CCQ functional state score</b> |                                   |                           |                             |                     |
| Baseline                          |                                   |                           |                             |                     |
| Mean±SD                           | 1.52±0.96                         | 2.10±1.19                 | 1.50±0.87                   | 1.84±1.10           |
| Median (Min-Max)                  | 1.25 (0.25, 3.00)                 | 1.88 (0.75, 5.50)         | 1.00 (1.00, 2.50)           | 1.75 (0.25, 5.50)   |
|                                   |                                   | Month 6/EOS               |                             |                     |
| Mean±SD                           | 1.55±1.72                         | 1.67±1.71                 | 2.50±0.00                   | 1.68±1.63           |
| Median (Min-Max)                  | 1.00 (0.00, 4.50)                 | 1.50 (0.00, 5.25)         | 2.50 (2.50, 2.50)           | 1.25 (0.00, 5.25)   |
|                                   |                                   | Change from baseline      |                             |                     |
| Mean±SD                           | 0.30±0.96                         | -0.29±1.57                | 0.00±0.00                   | -0.12±1.38          |
| Median (Min-Max)                  | 0.50 (-1.00, 1.50)                | -0.75 (-2.5, 3.00)        | 0.00 (-1.50, 2.00)          | -0.25 (-2.50, 3.00) |
| P-value                           | 0.625                             | 0.486                     | 0.988                       | 0.713               |
| <b>CCQ mental state score</b>     |                                   |                           |                             |                     |
| Baseline                          |                                   |                           |                             |                     |
| Mean±SD                           | 2.50±2.18                         | 2.75±2.04                 | 0.83±1.04                   | 2.48±2.05           |
| Median (Min-Max)                  | 2.00 (0.00, 6.00)                 | 2.50 (0.00, 5.50)         | 0.50 (0.00, 2.00)           | 2.00 (0.00, 6.00)   |
|                                   |                                   | Month 6/EOS               |                             |                     |
| Mean±SD                           | 1.40±1.85                         | 1.77±2.00                 | 4.00±0.00                   | 1.79±1.94           |
| Median (Min-Max)                  | 1.00 (0.00, 4.50)                 | 1.00 (0.00, 6.00)         | 4.00 (4.00, 4.00)           | 1.40 (0.00, 6.00)   |
|                                   |                                   | Change from baseline      |                             |                     |
| Mean±SD                           | -1.00±0.35                        | -0.96±1.95                | 2.00±0.00                   | -0.82±1.74          |
| Median (Min-Max)                  | -1.00 (-1.50, -0.5)               | -0.50 (-2.00, 2.00)       | 2.00 (1.00, 3.00)           | -0.40 (-5.00, 2.00) |
| P-value                           | 0.063                             | 0.100                     | 0.455                       | 0.056               |

\*p<0.05. Abbreviations: CCQ, clinical COPD questionnaire; EOS, end of study; Max, maximum; Min, minimum; SD, standard deviation.
